# Supplementary material for: High-performance aqueous rechargeable nickel//bismuth batteries with Bi2MoO6@rGO and Co0.5Ni0.5MoO4@rGO as electrode materials
Source: Royal Society of Chemistry journal article supplement (doi:10.1039/d2nj05911h), 2023-01-01
Supplement: d2nj05911h1.pdf [file d2nj05911h1.pdf]

# High performances aqueous rechargeable nickel//bismuth batteries with $\text{Bi}_2\text{MoO}_6@\text{rGO}$ and $\text{Co}_{0.5}\text{Ni}_{0.5}\text{MoO}_4@\text{rGO}$ as electrode materials

Wei-Wei Kang<sup>a</sup>, Ya-Nan Zhao<sup>a</sup>, Wen-Qing Zhang<sup>a</sup>, Ying Sun<sup>b</sup>, Xue-Qin Zhang<sup>b</sup>, Gui-Yun Yi<sup>a</sup>, Guang-Xu Huang<sup>a</sup>, Bao-Lin Xing<sup>a</sup>, Chuan-Xiang Zhang<sup>a</sup>, Bao-Ping Lin<sup>b\*</sup>

a. Henan Key Laboratory of Coal Green Conversion, College of Chemistry and Chemical Engineering, Henan Polytechnic University, Jiaozuo 454003, China

b. School of Chemistry and Chemical Engineering, Southeast University, Nanjing 211189, China

E-mail address: lbp@seu.edu.cn (B. Lin)

## Electrochemical Calculations:

### 1. Single electrode :

Based on discharge curves, the specific gravimetric capacity of active materials for the single electrode can be calculated according to the following equation (1):

$$C_m = \frac{I}{m} \times \Delta t \quad (1)$$

Where  $C_m$  (mAh/g) means the specific gravimetric capacity,  $I$  (A) means the discharge current,  $m$  (g) means the mass of active materials in the single electrode,  $\Delta t$  (s) means discharge time.

### 2. Ni//Bi battery:

The mass of the electrode active materials should be adjusted before assembling Ni//Bi battery so that two electrodes are balanced on the basis of equation (2):

$$C_m^- \times M_- = C_m^+ \times M_+ \quad (2)$$

Where  $C_m^-$  and  $C_m^+$  are the specific capacity of the cathode and anode (mAh/g),  $M_+$  and  $M_-$  are the mass of active materials (mg), respectively.

The specific capacity of two-electrode cell model ( $C_{\text{cell}}$ ) can also be calculated depending on software or equation (3):

$$C_{cell} = \frac{I}{m} \times \Delta t \quad (3)$$

Where  $C_{cell}$  (mAh/g) is specific capacity,  $I$  (A) is discharge current,  $\Delta t$  (s) is discharging time, and  $m$  (g) is total mass of active materials.

The energy density ( $E$ ) and power density ( $P$ ) of Ni//Bi battery can be calculated by the following equations (4) and (5):

$$E = \int_0^{\Delta t} IV_{(t)} dt \quad (4)$$

$$P = \frac{E}{\Delta t} \quad (5)$$

Where  $E$  (Wh/kg) is energy density,  $I$  (A/g) is current density,  $V(t)$  (V) is discharging voltage and  $dt$  is time differential,  $P$  (W/kg) is power density,  $\Delta t$  (s) is the discharging time.

#### The calculation of "b values":

The relationship between peak current ( $i$ ) and scanning rate ( $v$ ) obeying the equation (6):

$$i = av^b \quad (6)$$

Where  $a$  and  $b$  are different positive number. When  $0.5 < b < 1$ , the electrochemical behavior of electrode active materials is controlled by diffusion-controlled process and surface-capacitive effect. When  $b = 0.5$ , the electrochemical behavior is controlled by diffusion process. And when  $b = 1$ , the electrode exhibits surface-capacitive effect.

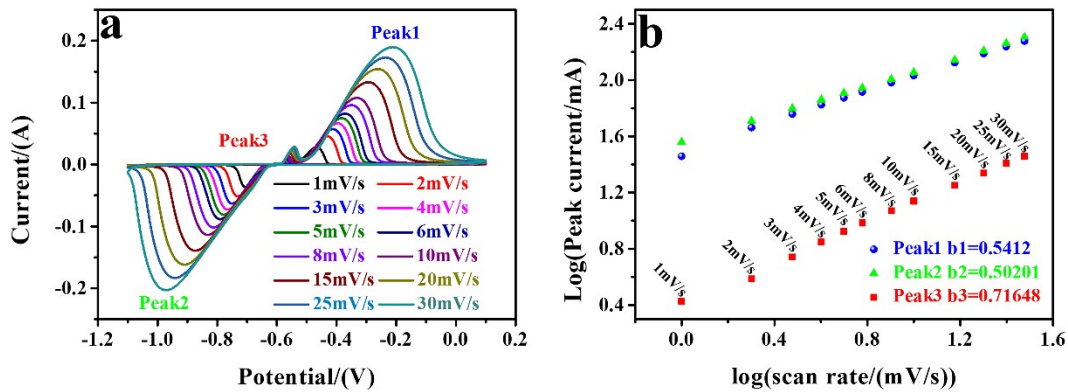

**Fig. S1** CV curves of  $\text{Bi}_2\text{MoO}_6@\text{rGO}-25$  (a); The relation between the anodic/cathodic peak current and the scan rate of  $\text{Bi}_2\text{MoO}_6@\text{rGO}-25$  (b)

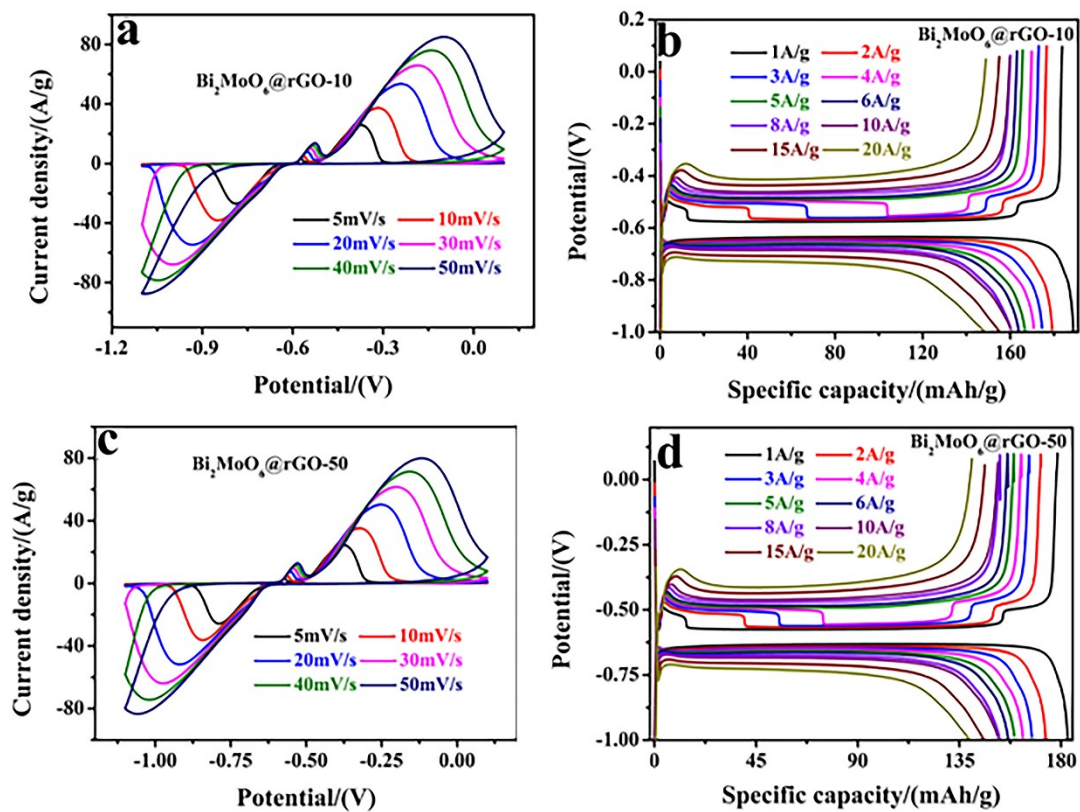

Fig. S2 CV curves of  $\text{Bi}_2\text{MoO}_6$ @rGO-10 (a) and  $\text{Bi}_2\text{MoO}_6$ @rGO-50 (c); GCD curves of  $\text{Bi}_2\text{MoO}_6$ @rGO-10 (b) and  $\text{Bi}_2\text{MoO}_6$ @rGO-50 (d)

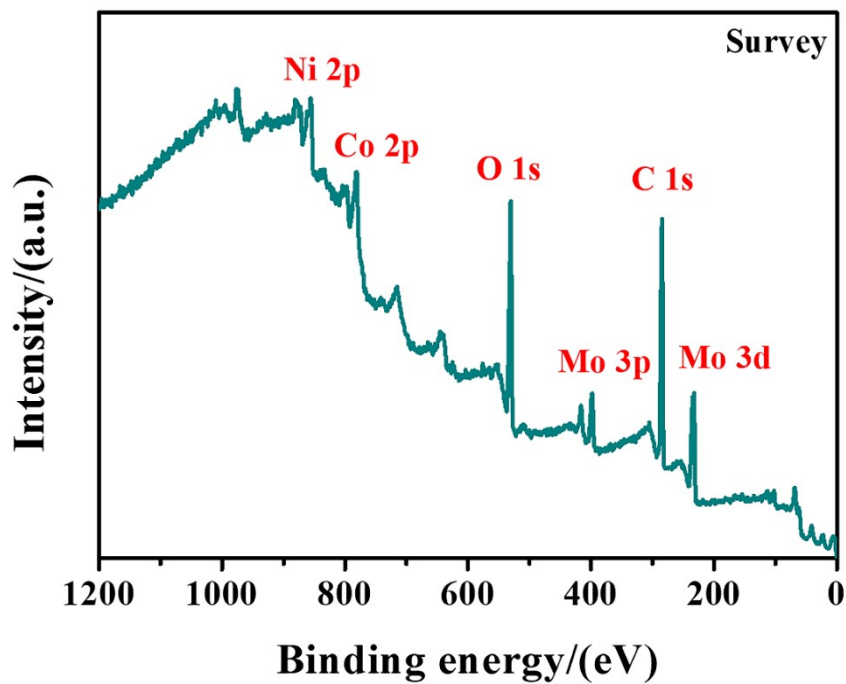

Fig. S3 XPS survey spectrum of  $\text{Co}_{0.5}\text{Ni}_{0.5}\text{MoO}_4$ @rGO-10

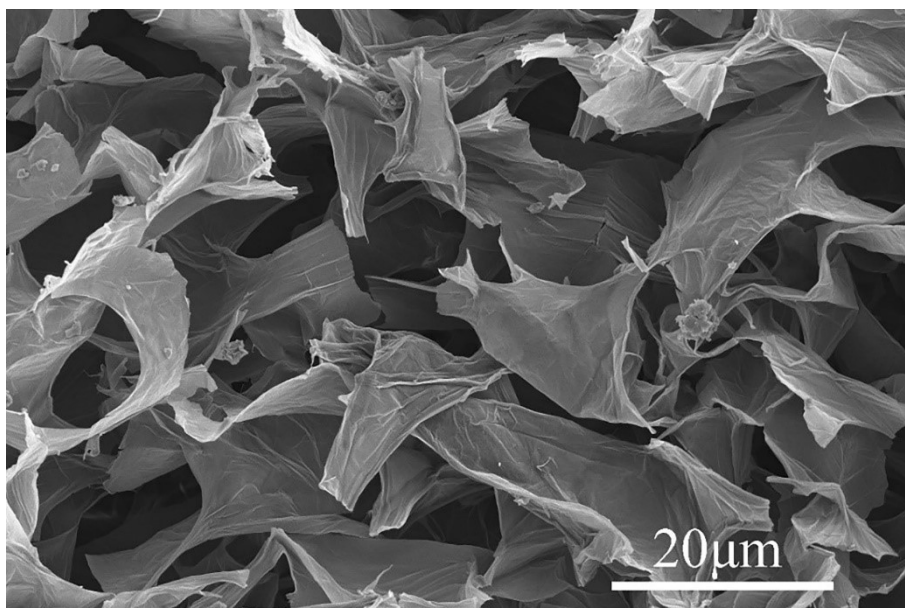

Fig. S4 SEM image of graphene oxide for cathode active materials

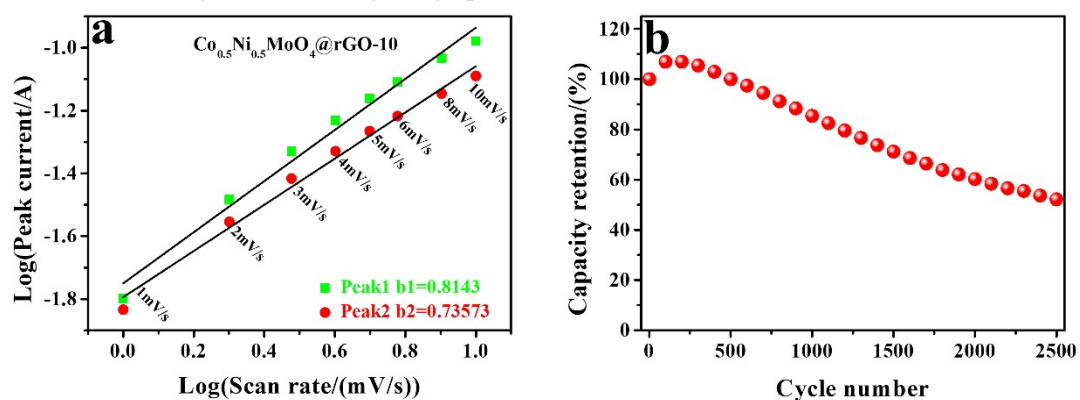

Fig. S5 The relation between the anodic/cathodic peak current and the scan rate of  $\text{Co}_{0.5}\text{Ni}_{0.5}\text{MoO}_4@\text{rGO}-10$  (a); Cycling performance of  $\text{Co}_{0.5}\text{Ni}_{0.5}\text{MoO}_4@\text{rGO}-10$  at 15 A/g (b)

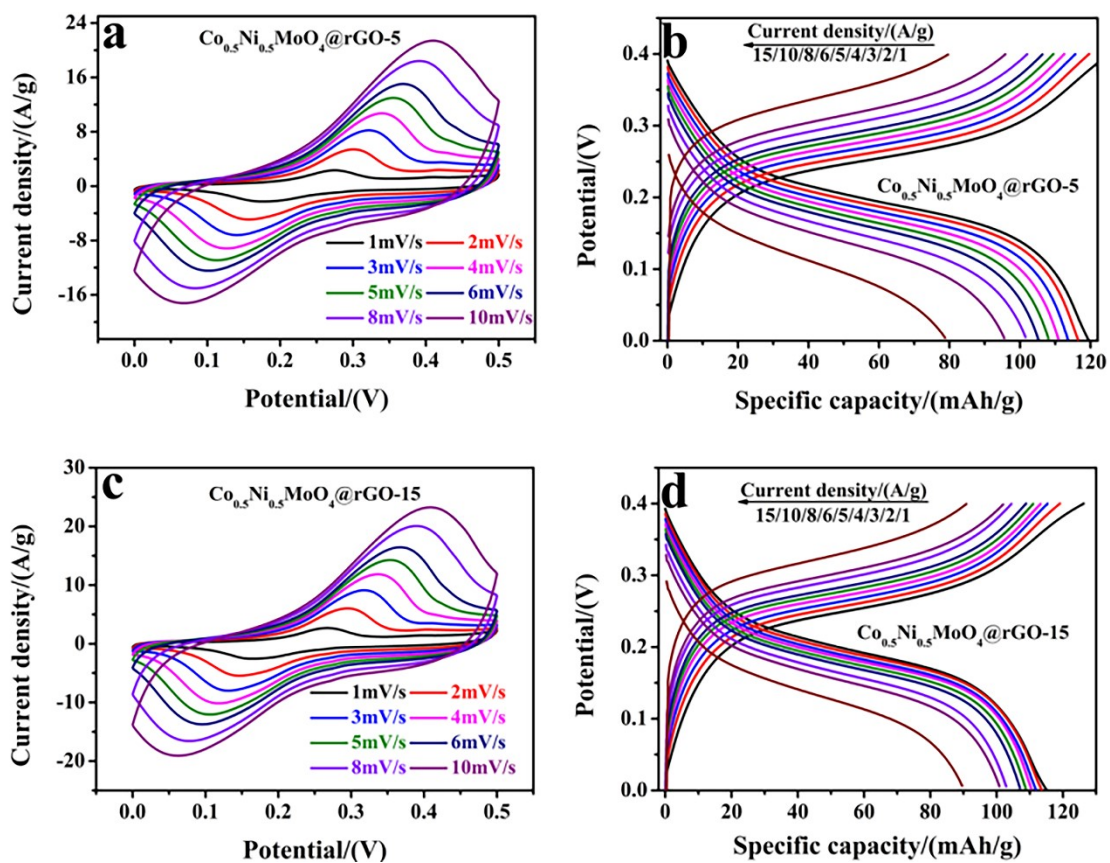

Fig. S6 CV curves of  $\text{Co}_{0.5}\text{Ni}_{0.5}\text{MoO}_4@\text{rGO-5}$  (a) and  $\text{Co}_{0.5}\text{Ni}_{0.5}\text{MoO}_4@\text{rGO-15}$  (c); GCD curves of  $\text{Co}_{0.5}\text{Ni}_{0.5}\text{MoO}_4@\text{rGO-5}$  (b) and  $\text{Co}_{0.5}\text{Ni}_{0.5}\text{MoO}_4@\text{rGO-15}$  (d)

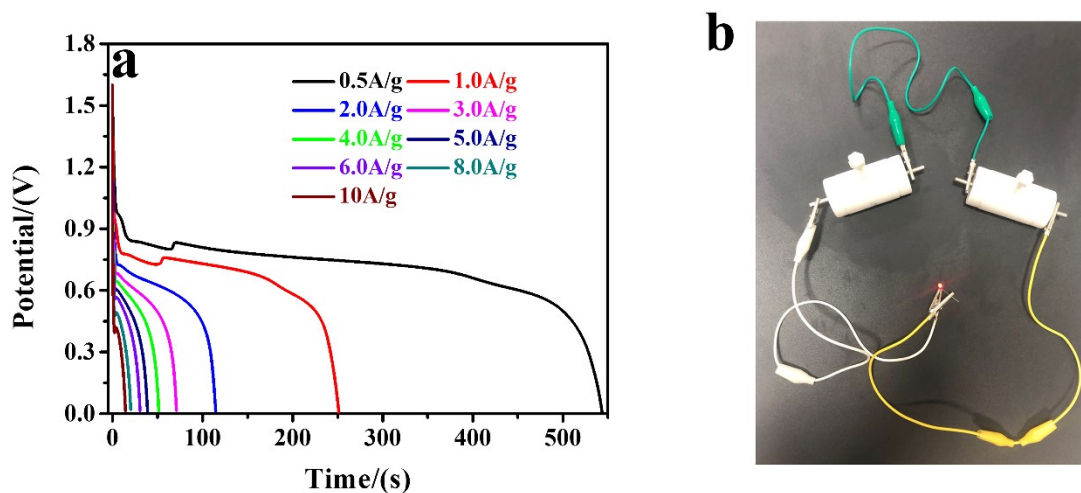

Fig. S7 Discharging curves at different current densities (a); picture shows two devices connected in series can light up one red LED bulb (b)
